# Supplementary material for: BCG therapy downregulates HLA-I on malignant cells to subvert antitumor immune responses in bladder cancer
Source: PubMed Central journal article supplement (PMC9197524; doi:10.1172/jci145666), 2022-06-15
Supplement: jci-132-145666-s111.pdf [file jci-132-145666-s111.pdf]

Supplemental Materials for

**BCG therapy downregulates HLA-I on malignant cells to subvert antitumor  
immune responses in bladder cancer**

**Authors:**

Mathieu Rouanne<sup>\*1,2,3</sup>, Julien Adam<sup>4,5†</sup>, Camélia Radulescu<sup>6</sup>, Diane Letourneur<sup>1,7</sup>,  
Séverine Mouraud<sup>1</sup>, Delphine Bredel<sup>1</sup>, Anne-Gaëlle Goubet<sup>1</sup>, Marion Leduc<sup>8,18</sup>, Noah  
Chen<sup>2</sup>, Tuan Zea Tan<sup>9</sup>, Nicolas Signolle<sup>10</sup>, Amélie Bigorgne<sup>11,12</sup>, Michael Dussiot<sup>11</sup>,  
Lambros Tselikas<sup>1</sup>, Sandrine Susini<sup>1</sup>, François-Xavier Danlos<sup>1</sup>, Anna K. Schneider<sup>10‡</sup>,  
Roman Chabanon<sup>13,14</sup>, Sophie Vacher<sup>15</sup>, Ivan Bièche<sup>15</sup>, Thierry Lebret<sup>3</sup>, Yves Allory<sup>6,15,16</sup>,  
Jean-Charles Soria<sup>12,18</sup>, Nicholas Arpaia<sup>2,19</sup>, Guido Kroemer<sup>8,18,20,21</sup>, Oliver Kepp<sup>8,18</sup>, Jean  
Paul Thiery<sup>10,22</sup>, Laurence Zitvogel<sup>1,23</sup>, Aurélien Marabelle<sup>\*1,12,23</sup>

**Affiliations :**

*<sup>1</sup>Institut National de la Santé et de la Recherche Médicale (INSERM) U1015, Equipe  
Labellisée Ligue Nationale contre le Cancer, Gustave Roussy, Université Paris-Saclay,  
94805 Villejuif, France*

*<sup>2</sup>Department of Microbiology and Immunology, Vagelos College of Physicians and  
Surgeons, Columbia University, New York, NY 10032, USA*

*<sup>3</sup>Département d'Urologie, Hôpital Foch, UVSQ-Université Paris-Saclay, 92150 Suresnes,  
France*

<sup>4</sup>*Département de Biologie et Pathologie Médicales, Gustave Roussy, Université Paris-Saclay, 94805 Villejuif, France*

<sup>5</sup>*INSERM U1186, Gustave Roussy, 94805 Villejuif, France*

<sup>6</sup>*Département de Pathologie, Hôpital Foch, UVSQ-Université Paris-Saclay, 92150 Suresnes, France*

<sup>7</sup>*Master de Biologie, École Normale Supérieure de Lyon, Université Claude Bernard Lyon I, Université de Lyon, 69342, Lyon Cedex 07, France*

<sup>8</sup>*Metabolomics and Cell Biology Platforms, Gustave Roussy Cancer Center, Université Paris Saclay, 94805 Villejuif, France*

<sup>9</sup> *Genomics and Data Analytics Core (GeDaC), Cancer Science Institute of Singapore, National University of Singapore, 14 Medical Drive, #12-01, Singapore 11759*

<sup>10</sup>*INSERM U981, Gustave Roussy, 94805 Villejuif, France*

<sup>11</sup>*INSERM U1163, Institut Imagine, Université de Paris, 75015 Paris, France*

<sup>12</sup>*Département d'Innovation Thérapeutique et d'Essais Précoces (DITEP), Gustave Roussy, Université Paris-Saclay, 94805 Villejuif, France*

<sup>13</sup>*ATIP-Avenir Group, INSERM U981, Gustave Roussy, Université Paris-Saclay, 94805 Villejuif, France*

<sup>14</sup>*The CRUK Gene Function Laboratory and Breast Cancer Now Toby Robins Breast Cancer Research Centre, The Institute of Cancer Research, London, United Kingdom*

<sup>15</sup>*Service de Génétique, Institut Curie, PSL Research University, 75005 Paris, France.*

<sup>16</sup>*Département de Pathologie, Institut Curie, 92210 Saint-Cloud, France*

<sup>17</sup>*Centre National de la Recherche Scientifique (CNRS) UMR144, Equipe Labellisée Ligue Nationale Contre le Cancer, 75005 Paris, France*

<sup>18</sup>*Gustave Roussy, Université Paris-Saclay, 94805 Villejuif, France*

<sup>19</sup>*Herbert Irving Comprehensive Cancer Center, Columbia University, New York, NY  
10032, USA*

<sup>20</sup>*Centre de Recherche des Cordeliers, Equipe labellisée par la Ligue contre le cancer,  
Université de Paris, Sorbonne Université, INSERM U1138, Institut Universitaire de  
France, Paris, France*

<sup>21</sup>*Pôle de Biologie, Hôpital Européen Georges Pompidou, AP-HP, Paris, France*

<sup>22</sup>*Guangzhou Laboratory, Guangzhou 510530, China*

<sup>23</sup>*Centre d'Investigation Clinique de Biothérapies du Cancer (CICBT), 94805 Villejuif,  
France*

†Present address: Urology Research Unit, Departement of Urology, Centre Hospitalier  
Universitaire Vaudois (CHUV), 1011 Lausanne, Switzerland.

‡Present address: Department of Pathology, Saint Joseph Hospital, 75014 Paris, France

**Correspondance to:**

Dr Mathieu Rouanne MD, PhD

Email: [rouanne.mathieu@gmail.com](mailto:rouanne.mathieu@gmail.com); [mr4104@cumc.columbia.edu](mailto:mr4104@cumc.columbia.edu)

Prof. Aurélien Marabelle MD, PhD

Email: [aurelien.marabelle@gustaveroussy.fr](mailto:aurelien.marabelle@gustaveroussy.fr)

## **Supplemental Methods**

### **Patient cohort and clinical end points**

A cohort of 27 patients with non-metastatic, primary high-grade NMIBC was included in this study. Patients who acquired BCG resistance defined as tumor progression to muscle-invasive tumor (MIBC) post-BCG were included. Clinical follow-up included cystoscopy and urine cytology every 3 months for the first 2 years, then every 6 months. Tumor samples were obtained by TURBT or radical cystectomy and provided formalin-fixed and paraffin-embedded (FFPE). Only initial high-grade tumors with a visible, clearly identifiable, and disease-free muscularis propria were included in this study. Tumor samples obtained pre-BCG at baseline and post-BCG at time of disease progression was required for enrollment. Importantly, the FFPE blocks were selected from the first TURBT to avoid post-surgical inflammatory lesions in bladder tissue wound repair (Supplemental Figure 6). Tumor samples were initially reviewed by two pathologists (C.R. and J.A.). Clinicopathological and demographic data were collected from patient records at Hôpital Foch and are shown in Supplemental Table 5. Overall survival (OS) was defined as the time between the TURBT and the date of death (any cause). Cancer-specific survival (CSS) was defined as the time between the first TURBT and the date of death related to bladder cancer. For subjects without documentation of death, OS and CSS were censored on the last date the patient was known to be alive. Distant metastasis free survival (DMFS) was defined as the time between the first TURBT and the date of documented distant metastasis. For patients without documentation of distant metastasis, DMFS was censored on the last date the patient was known to be without metastasis.

### **Fresh tumor samples**



All the tumors were collected within 1hr from surgery and stored in complete medium at 4°C from 12hrs to 20hrs prior to dissociation. Clinicopathological and demographic data were collected from patient records at Hôpital Foch and are shown in Supplemental Table 1. Primary bladder tumors were freshly mechanically and enzymatically dissociated using the Miltenyi Gentle MACS OctoDissociator (Miltenyi Biotec) equipment for 1hr at 37°C under mechanical rotation (2 incubation steps of 30 minutes).

The medium used for tumor dissociation consisted of RPMI 1640 (GIBCO Life Technologies, ref: 31870-025), Collagenase IV (50IU/mL) (Sigma-Aldrich, ref: C2139), Hyaluronidase (280IU/mL) (Sigma-Aldrich, ref: H6254), and DNase I (30IU/mL) (Sigma-Aldrich, ref: 260913). Cell samples were diluted in PBS, passed through a cell strainer, and centrifuged for 5 minutes at 1500 rpm. Cells were finally resuspended in PBS, stained for baseline phenotyping of CD45<sup>+</sup> immune cells and counted with Precision Count Beads™ (Biolegend, ref: 424902) by flow cytometry following manufacturer's protocol.

### **BCG reconstitution**

ImmuCyst BCG is made from a live-attenuated strain of *Mycobacterium bovis*. The *bacilli* are lyophilized (freeze-dried) and are viable upon reconstitution. It contains 81 mg (dry weight) of BCG and 150 mg monosodium glutamate. Each vial of ImmuCyst is reconstituted with 3 mL of sterile, preservative-free saline solution. The reconstituted dose contains approximately  $10.5 \pm 8.7 \times 10^8$  colony-forming units (CFU). For clinical use, the reconstituted material from the vial is further diluted in an additional 50 mL of sterile, preservative-free saline solution to a final volume of 53 mL for instillation into the bladder. Therefore, the final concentration in the bladder is approximately  $2 \times 10^7$  CFU/mL.

### **Ex vivo bladder tumor stimulation assay**

The experimental protocol was adapted from Jacquelot et al (37). We performed an ex vivo tumor stimulation assay providing from 12 fresh human bladder tumors. Freshly dissociated cells were seeded in 96-wells plate and incubated in complete medium (RPMI 1640 (GIBCO Life Technologies, ref: 31870-025) supplemented with 10% human AB serum (Institute Jacques Boy, ref: 201021334), 1% Penicillin/Streptomycin (GIBCO Invitrogen, ref:15140-122), 1% L-glutamine (GIBCO Life Technologies, ref: 25030-024) and 1% of sodium pyruvate (GIBCO Life Technologies, ref: 11360-039)), or stimulated with IFN $\gamma$  ( $1 \cdot 10^3$  UI/mL) or with reconstituted ImmuCyst (BCG sub-strain Connaught  $2 \cdot 10^7$  CFU/mL).

### ***Cell lines***

Murine bladder cancer cell line MB49 was originally generated by 7,12-dimethylbenz[a]anthracene (DMBA) in vitro exposure to bladder epithelium from male C57BL/6 mice (38). The UPPL bladder cancer cell line was obtained from Prof William Y. Kim of the University of North Carolina. UPPL1541 was originally generated from spontaneously arising bladder tumors in Upk3a-Cre<sup>ERT2</sup>; Trp53<sup>L/L</sup>; Pten<sup>L/L</sup>; Rosa26<sup>LSL-Luc</sup> mice (39). All the cell lines have been tested and found negative for Mycoplasma contamination.

### **BCG co-culture**

Urothelial cancer cells were plated a day prior to infection in antibiotic-free media to reach 80-90% confluence on the day of infection. Lyophilized ImmuCyst Bacillus Calmette-Guérin (BCG) (Connaught sub-strain, 81 mg at  $10.5 \pm 8.7 \cdot 10^8$  CFU/mL) was reconstituted within PBS 1X as recommended for clinical use. BCG was co-incubated in antibiotic-free media to achieve a multiplicity of infection (MOI) of 10:1 or 5:1 as reported. Plates were

incubated at 37°C for the indicated time and then washed with 1XPBS, detached using trypsin, resuspended in complete medium. After passage on 70µm filter and centrifugation, cells were resuspended in 1XPBS for analysis by flow-cytometry.

### ***In vitro* BCG re-stimulation assay**

This protocol originally described to study trained immunity in human monocytes has been adapted from Bekkering et al (40).

### **Chromogenic Immunohistochemistry (IHC)**

The main steps for chromogenic IHC are described below. Sections were deparaffinized in xylene. Antigen retrieval was performed using ultra cell conditioning 1 (CC1) buffer for 36 minutes at 95°C. Sections were incubated with a primary antibody (see table below) during 1hr at room temperature. Amplification was achieved using an UltraView universal DAB detection kit. Revelation using 3,3'diaminobenzidine as chromogen was applied to sections. Nuclear counterstaining was performed with Hematoxylin II and bluing reagent. Coverslip was applied with a permanent mounting medium.

### **Image analysis**

Image analysis was done on manually selected (exclusion of areas of necrosis, preparation artifacts) regions of interest (ROI). As these regions were large, they were divided into blocks of pixels processed individually and stitched at the end. The method combined watershed segmentation on DAB staining and color and morphological characteristics to retrieve automatically CD3<sup>+</sup> or CD8<sup>+</sup> cells. The program exports the number of CD3<sup>+</sup> or CD8<sup>+</sup> cells and the tissue areas in µm<sup>2</sup> for each analyzed ROI. DAB-stained nucleus is automatically detected using their IHC spectral properties in manually

selected regions of interest. The routine scores (low, medium, and high) each nucleus on its intensity. In our cases, low classification corresponded to false positive staining and was discarded.

### **NanoString gene expression profiling**

Formalin-fixed paraffin-embedded tumor specimens with sufficient bladder tumor area were selected for RNA extraction (n=12). Only paired bladder samples pre- and post-BCG therapy were used for this study. Macrodissection of selected tumor areas followed by RNA extraction using High Pure FFPE RNA Isolation Kit – Roche Life Science (ref:06483852001) were performed. The samples were stored at  $-80^{\circ}\text{C}$ . Isolated RNA was hybridized with the NanoString nCounter PanCancer Immune Profiling Human Panel CodeSet. For cancer cell analysis, cell sorting was performed 24hrs after BCG co-culture. Next, RNA was extracted using the Direct-zol RNA MiniPrep Kit (Zymo Research). The samples were stored at  $-80^{\circ}\text{C}$ . Isolated RNA was hybridized with the NanoString nCounter IO360 Panel Human Panel CodeSet and quantified using the nCounter Digital Analyzer. Data were processed with nSolver Analysis Software (NanoString) using the Advanced Analysis module.

### **Transcriptomics (3' Tag-Seq)**

In contrast to traditional RNA-seq, which generates sequencing libraries for the whole transcript, 3' Tag-Seq only generates a single initial library molecule per transcript, complementary to 3' end sequences. In consequence, for human samples the restriction to a small part of the transcripts reduces the number of sequencing reads required, has exceptionally low background noise, as well as insensitivity to RNA sample quality variations, in particular FFPE tumor samples.

## **Bioinformatics analysis**

To improve the statistical power of the analysis, only genes expressed in at least one sample (CPM  $\geq 0.1$ ) were considered. A *q*val threshold of  $\leq 0.05$  and a minimum fold change of 1.2 were used to define differentially expressed genes. Pathway enrichment analysis – GSEA Gene list from the differential analysis was ordered by decreasing log<sub>2</sub> fold change. Gene set enrichment analysis was performed by clusterProfiler:GSEA function using the fgsea algorithm.

## **ImageStream analysis**

For in vitro infection, BCG was labelled with calcein after co-incubation in complete medium for 30 min at 37°C 5%CO<sub>2</sub> protected from light. Urothelial cancer cells were co-incubated with calcein-labeled BCG (MOI 10:1) for 24hrs or incubated with IFN $\gamma$  (1.10<sup>3</sup> U/mL) or RMPI 10% heat-inactivated FBS. Cells were harvested using trypsin, washed twice with 1xPBS, and stained with surface antibodies. Hoeschst was added 15 min before image acquisition.

## **Quantification of autophagy in U2OS cells (image analysis)**

Images were processed and segmented with R using the EBImage package (available on the Bioconductor repository <https://www.bioconductor.org>), the MorphR and the MetaxpR package (both available at <https://github.com/kroemerlab>). First the nuclear region was defined by using a polygon mask based on the fluorescent signal of Hoechst 33342, which allowed for the further segmentation of cells and for evaluating morphological parameters such as the size of the nucleus and the Hoechst signal intensity. Extending from this nuclear region of interest (ROI), the cytoplasmic region was

identified based on the diffuse GFP signal present in the biosensor cells expressing GFP-LC3. Cytoplasmic regions of higher GFP fluorescence were detected to quantify GFP-LC3 puncta formation. For the assessment of autophagic flux the LC3 puncta were additionally detected based on the RFP signal.

### **Quantification of autophagy in U2OS cells (data analysis)**

Data extracted from image analysis were further analyzed with the R software. First pyknotic nuclei, dead cells and debris were excluded from the data set, based on intensity and size parameters. GFP-LC3 aggregation was evaluated by the number/surface area of GFP dots per cell; data were normalized using negative control (untreated condition) to obtain a fold change. Autophagic fluxes were assessed using the surface of autophagosomes compared to the total surface of aggregates (autophagosomes and autophagolysosomes). A linear regression between the surface of dots present in both channels (autophagosomes only) and the total surface of dots (autophagosomes and autophagolysosomes) was calculated on control data (negative and positive control data), and a flux inhibition score was computed by calculating the distance of each data point to the regression line. Results were then evaluated based on inhibition score and the total surface of aggregates.

### **List of antibodies used in this study**

| <b>Antigen</b> | <b>Conjugate</b> | <b>Clone</b> | <b>Vendor</b>  | <b>Catalog number</b> |
|----------------|------------------|--------------|----------------|-----------------------|
| HLA-I          | AF700            | W6/32        | BioLegend      | 311438                |
| CD45           | BUV805           | HI30         | BD Biosciences | 564914                |
| EpCAM          | PECy7            | 1B7          | eBiosciences   | 25-9326-42            |
| Zombie Aqua    | BV510            | N/A          | Biolegend      | 423102                |
| Annexin-V      | APC              | N/A          | Biolegend      | 640920                |

|             |            |          |                |            |
|-------------|------------|----------|----------------|------------|
| Ki-67       | FITC       | N/A      | BD Biosciences | 556026     |
| CD3         | BUV395     | UCHT1    | BD Biosciences | 563546     |
| CD4         | BUV496     | SK3      | BD Biosciences | 564651     |
| FoxP3       | APC        | PCH101   | eBiosciences   | 17-4776-42 |
| CD8         | APC-H7     | SK1      | BD Biosciences | 560179     |
| CD20        | PE         | 2H7      | Biolegend      | 302306     |
| CD11b       | PB         | M1/70    | Biolegend      | 101224     |
| CD56        | BV650      | HCD56    | Biolegend      | 318344     |
| HLA-DR      | PerCpCy5.5 | G46-6    | BD Biosciences | 552764     |
| CD69        | FITC       | FN50     | BD Biosciences | 555530     |
| PD1         | PECy7      | PD1.3    | Beckman        | PN A78885  |
| Mouse H-2Kb | FITC       | AF6-88.5 | BioLegend      | 116505     |

### Supplemental References

37. Jacquelot N et al. Predictors of responses to immune checkpoint blockade in advanced melanoma. *Nat. Commun.* 2017;8(1):592.

38. Franks ISL. Effects of donor age on neoplastic transformation of adult mouse bladder epithelium in vitro. *JNCI J. Natl. Cancer Inst.* 1979;62(4):1017–1023.

39. Saito R et al. Molecular Subtype-Specific Immunocompetent Models of High-Grade Urothelial Carcinoma Reveal Differential Neoantigen Expression and Response to Immunotherapy. *Cancer Res.* 2018;78(14):3954–3968.

40. Bekkering S et al. In Vitro experimental model of trained innate immunity in human primary monocytes. *Clin. Vaccine Immunol.* 2016;23(12):926–933.

## **Supplemental Figures**

**Supplemental Figure 1.** Ex vivo BCG stimulation of fresh human bladder tumors and cancer cell lines induces HLA-I downregulation on cancer cells.

**Supplemental Figure 2.** BCG induces EMT characteristics in HLA-I<sup>-</sup> cancer cells

**Supplemental Figure 3.** BCG mostly induces inflammatory responses in HLA-I<sup>+</sup> cancer cells.

**Supplemental Figure 4.** BCG infected cancer cells downregulate HLA-I and EpCAM molecules

**Supplemental Figure 5.** BCG downregulates HLA-I on U2OS Human osteosarcoma reporter cell line

**Supplemental Figure 6.** Methods for in situ immune profiling in a longitudinal cohort of paired bladder tumors pre- and post-BCG.

**Supplemental Figure 7.** Acquired resistance to BCG immunotherapy significantly induces upregulation of immune-checkpoint inhibitory receptors and tumor infiltrating CD8<sup>+</sup> lymphocytes.



**Supplemental Figure 1. Ex vivo BCG stimulation of fresh human bladder tumors and cancer cell lines induces HLA-I downregulation on cancer cells.**

(A) Bar plots showing the proportions of CD45<sup>+</sup> and CD45<sup>-</sup> cells in live cells among fresh bladder tumors based on flow cytometry analyses at baseline. BLCA: Bladder Cancer (n=12).

(B) Proportions (left panel) and mean fluorescence intensity (MFI, right panel) of HLA-I<sup>+</sup> in CD45<sup>+</sup>Epcam<sup>-</sup> cells (n=12; One-way ANOVA with Tukey's post test).

(C) Relative proportions of tumor-infiltrating immune cells following in vitro BCG or IFN $\gamma$  stimulation of fresh human bladder tumors. Live leukocytes (CD45<sup>+</sup>; top left panel; n=12; one-way ANOVA with Tukey's post test) and tumor-infiltrative T cells (CD3<sup>+</sup>; top right panel) within those leukocytes (n=6; one-way ANOVA with Tukey's post test). Proportions of lymphoid cells (CD4<sup>+</sup>, CD8<sup>+</sup>, FoxP3<sup>+</sup>, CD56<sup>+</sup> & CD20<sup>+</sup>) and myeloid cells (CD11b<sup>+</sup>) among live CD3<sup>+</sup> or CD45<sup>+</sup> cells respectively, following in vitro stimulation with BCG or IFN $\gamma$ . Each dot represents one tumor (n=6; One-way ANOVA with Tukey's post test).

(D) Proportions of activated T cells (CD69 & PD1 on CD3<sup>+</sup> cells) and activated myeloid cells (HLA-DR<sup>+</sup> on CD11b<sup>+</sup> cells) following in vitro stimulation with BCG or IFN $\gamma$ . Each dot represents one tumor (n=6; One-way ANOVA with Tukey's post test).

(E) Flow cytometry histogram showing in vitro HLA-I downregulation in a subset of cells post-BCG exposure across 6 bladder cancer cell lines.

(F) Representative histogram showing in vitro  $\beta$ 2-microglobulin downregulation in a subset of cells post-BCG exposure.

(G)  $\beta$ 2-microglobulin MFI by flow-cytometry 24hrs upon in vitro BCG or IFN $\gamma$  exposure (n=3 conditions per cell line; one-way ANOVA with Tukey's post test).

All data are presented as mean  $\pm$  s.e.m.

### **Supplemental Figure 2. BCG induces EMT characteristics in HLA-I<sup>-</sup> cancer cells**

(A) Phenotypic characteristics of HLA-I<sup>-</sup> cancer cells (in red) among cancer cell populations (in grey). Representative dot-plots for one cell line (5637).

(B) Representative imaging of untreated parental 5637 cancer cells (parental) and cell-sorted HLA-I<sup>-</sup> cells 24hrs after BCG exposure.

(C) Flow cytometry EpCAM expression 6 days after independent culture of HLA-I<sup>+</sup> and HLA-I<sup>-</sup> cancer cells in BCG-free medium shows sustained Epcam downregulation in RT4, 5637 and HT1376 cell lines.

(D) EMT score for urothelial cancer cell lines (n=8) based on selected gene expression profiles from the IO360 NanoString panel.

(E) MB49 and UPPL murine bladder cancer lines do not express HLA-I but can express it upon IFN $\gamma$  exposure (flow cytometry MFI of pan-HLA-I staining).

### **Supplemental Figure 3. BCG mostly induces inflammatory responses in HLA-I<sup>+</sup> cancer cells.**

(A) Cytokine and chemokine levels (27-plex) in the supernatant of bladder cancer cells (n=3 cell lines, RT4, 5637, and UM-UC3) were measured separately in HLA-I<sup>+</sup> cells

24hrs after co-incubation with BCG, cell-sorting and independent culture in BCG-free medium for 72hrs (n=3 independent experiments in triplicate per cell line).

(B) Cytokine and chemokine levels (27-plex) in the supernatant of bladder cancer cells (n=3 cell lines, RT4, 5637, and UM-UC3) were measured separately in HLA-I<sup>-</sup> cells 24hrs after co-incubation with BCG, cell-sorting and independent culture in BCG-free medium for 72hrs (n=3 independent experiments in triplicate per cell line).

#### **Supplemental Figure 4. BCG infected cancer cells downregulate HLA-I and EpCAM molecules**

(A) Stimulation assay of cancer cells with TLR2, TLR4, TLR9, and combinations compared to BCG (one-way ANOVA with Tukey's post test).

(B) Percentage of cancer cells infected by calcein-labeled BCG and MFI calcein-labeled BCG among cell lines (n=3 cell lines; one-way ANOVA with Tukey's post test).

(C) Viability (MFI of calcein) of BCG upon different conditions: BCG not labelled with calcein, heat-killed BCG with calcein (80°C for 60 min), UV-B exposed BCG with calcein (UV-B for 60 min), live BCG with calcein (one-way ANOVA with Tukey's post test).

#### **Supplemental Figure 5. BCG downregulates HLA-I on U2OS Human osteosarcoma reporter cell line**

(A) Illustration of the principles for autophagy measurements with LC3-GFP and LC3-RFP tandem U2OS Human osteosarcoma reporter cell lines. Briefly, autophagosomes fuse

with lysosomes to become autophagolysosomes. The LC3 protein is uniquely expressed within those intracytoplasmic vesicles. Autophagosomes are yellow in immunofluorescence upon co-expression of LC3-GFP and LC3-RFP proteins. Upon acidification of pH after fusion with lysosomes, the GFP fluorescence is no longer visible. However the RFP remains functional and the autophagolysosomes turn red. The autophagy flux increases when the number of red vesicles increases upon stimulation, whereas it is inhibited when more yellow vesicles (autophagosomes) accumulate in the cytoplasm. Figure adapted from *Lopez A, et al. Seeing is believing: methods to monitor vertebrate autophagy in vivo. Open Biol 2018;8:180106*. Of note, the GFP-LC3 cell line used in Figure 5E (without RFP) can only track autophagosomes. The GFP+RFP-LC3 tandem cell line depicted here and used for Figure 6F and 6G experiments can also assess the formation of autophagolysosomes.

(B) HLA-I negative cells in GFP-LC3 U2OS cells untreated (B, top and C, top left panel), and treated for 24hrs with BCG (B, bottom panel),

(C) HLA-I negative cells in GFP-LC3 U2OS cells treated for 48hrs with IFN $\gamma$  (C, top right, and bottom panels) treated for 24hrs with BCG (C, bottom panels) or not treated with BCG (C top right panel). One representative gate of three/four technical replicates is depicted.

(D) Proportions of HLA-I negative cells within live GFP-LC3 U2OS cells treated with or without BCG in presence or not of IFN $\gamma$ . Data from one experiment are showed as mean  $\pm$  s.e.m. of three/four technical replicates (Kruskal-Wallis with Dunn's post test).

**Supplemental Figure 6. Methods for in situ immune profiling in a longitudinal cohort of paired bladder tumors pre- and post-BCG.**

**Supplemental Figure 7. Acquired resistance to BCG immunotherapy significantly induces upregulation of immune-checkpoint inhibitory receptors and tumor infiltrating CD8<sup>+</sup> lymphocytes.**

(A) Expression of HLA-I on cancer cells pre- and post-BCG in the whole cohort (n=27).

(B) Volcano plot of differences of gene expression by NanoString profiling between BCG naïve and BCG resistant bladder tumors (x axis: Log<sub>2</sub> fold-change (FC) of difference) and significance (y axis). Solid grey dots show the genes with significant difference (FDR<0.05).

(C) EMT score (RNA-Seq) and HLA-I expression (IHC) on cancer cells in a longitudinal series of paired tissue samples of patients acquiring BCG resistance and metastatic disease post-BCG (n=3).

(D) Representative images of CD3<sup>+</sup>, CD8<sup>+</sup>, CD68<sup>+</sup>/CD163<sup>+</sup> and PD-L1 staining by immunohistochemistry in BCG resistant tumors are shown.

(E) Immune profiling by immunohistochemistry in tumor samples pre- and post-BCG in the whole cohort (n=27). Density of CD3<sup>+</sup>(%) cells, CD8<sup>+</sup>(%) cells, CD8<sup>+</sup> in CD3<sup>+</sup> cells (%), CD68<sup>+</sup> (%) cells, CD163<sup>+</sup> (%) cells and PD-L1 expression on immune cells (%) are shown. Two-tailed paired t-tests.

(F) Heat map illustrating the level of NK- and gamma-delta T cells related gene expression in HLA-I<sup>-</sup> and HLA-I<sup>+</sup> bladder tumors post-BCG (Limma *P* value). In situ gene expression analysis by RNA-Seq.

(G) Relative abundance of NK cells in HLA-I<sup>-</sup> and HLA-I<sup>+</sup> bladder tumors post-BCG (unpaired two-tailed t test). Estimation of the abundance of the NK and gd T cells population using the computational method MCP-counter (58).

All data are presented as mean  $\pm$  s.e.m.

# Supplemental Figure 1

**A**

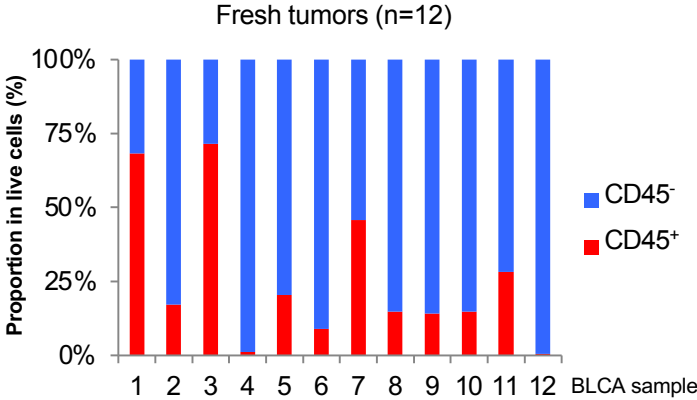

**B**

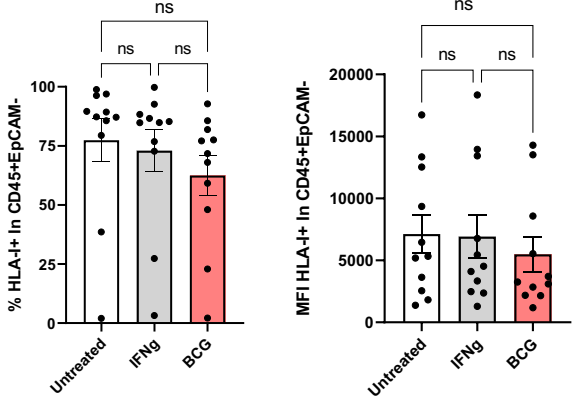

**C**

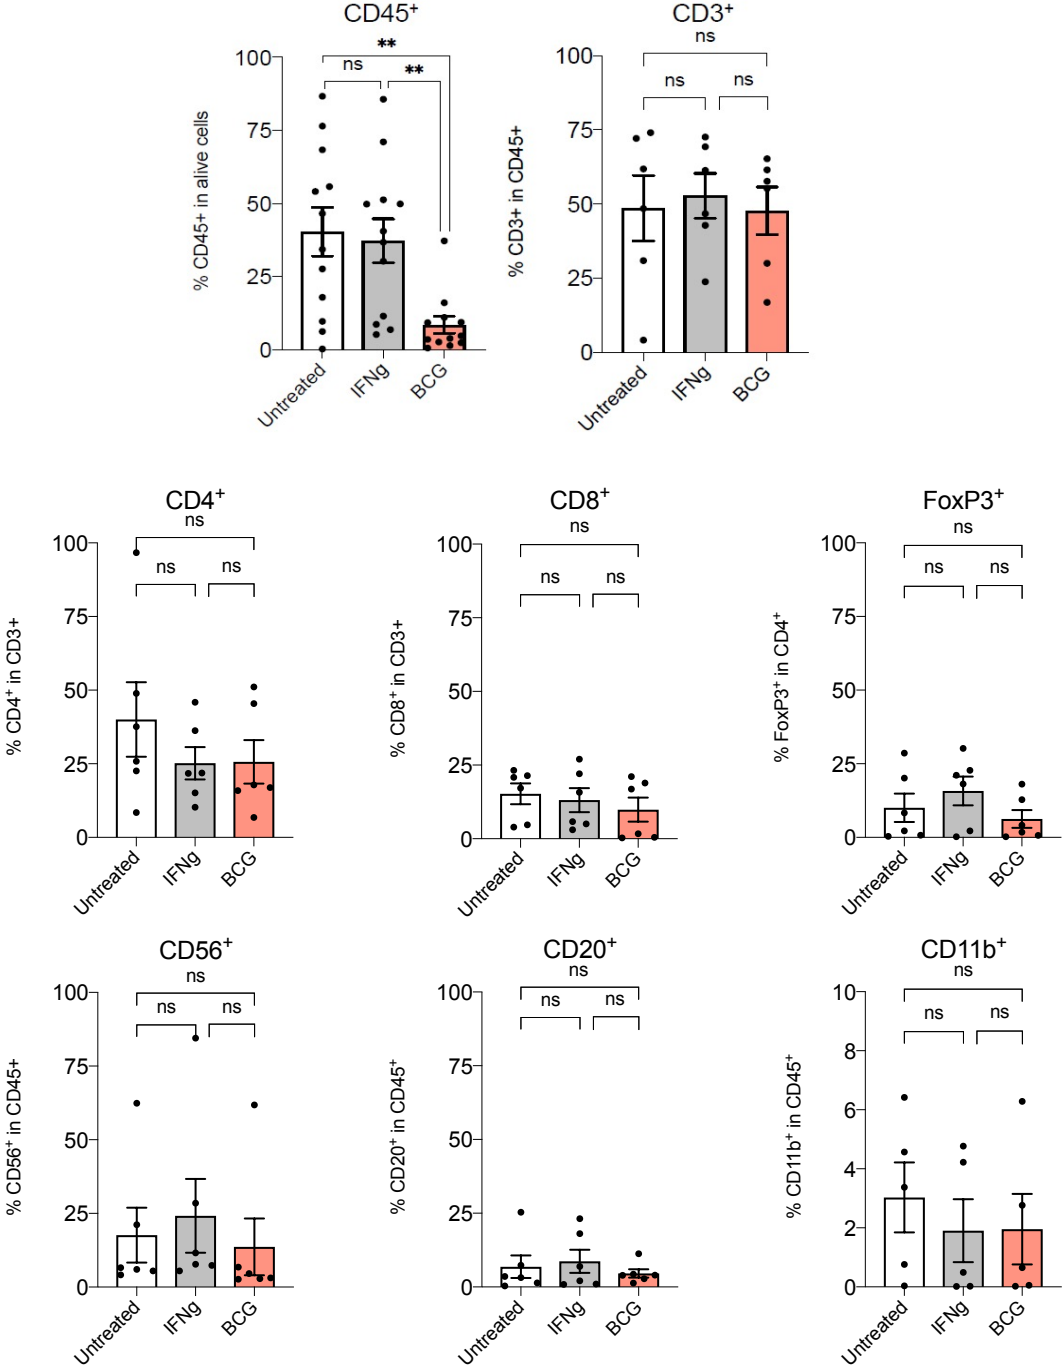

# Supplemental Figure 1

**D**

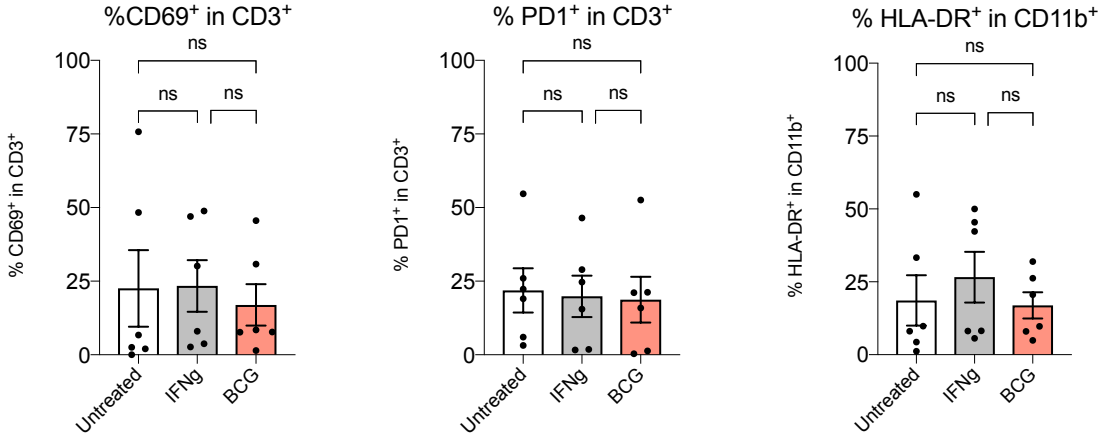

**E**

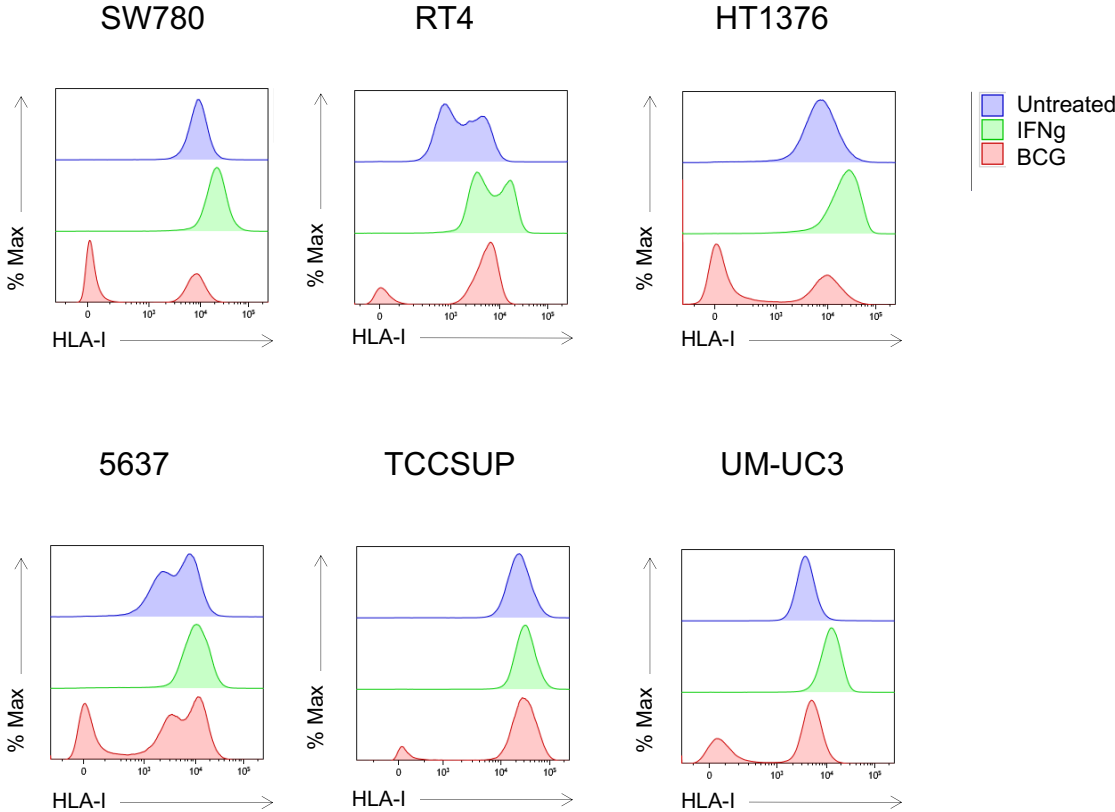

**F**

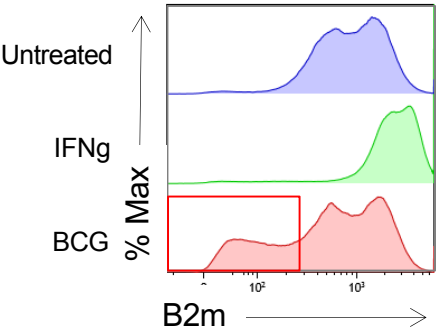

**G**

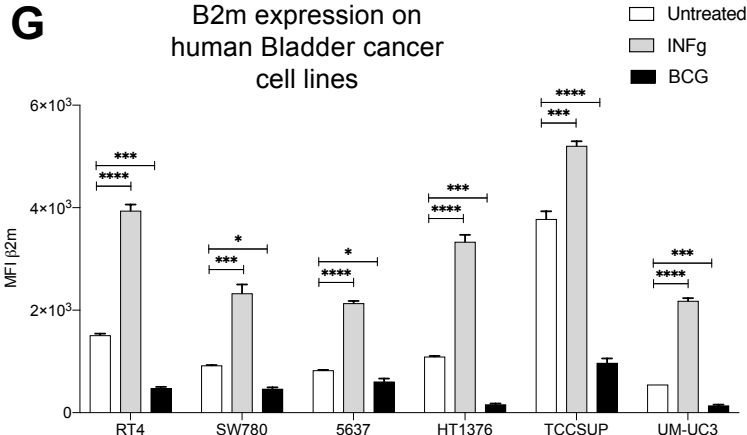



# Supplemental Figure 2

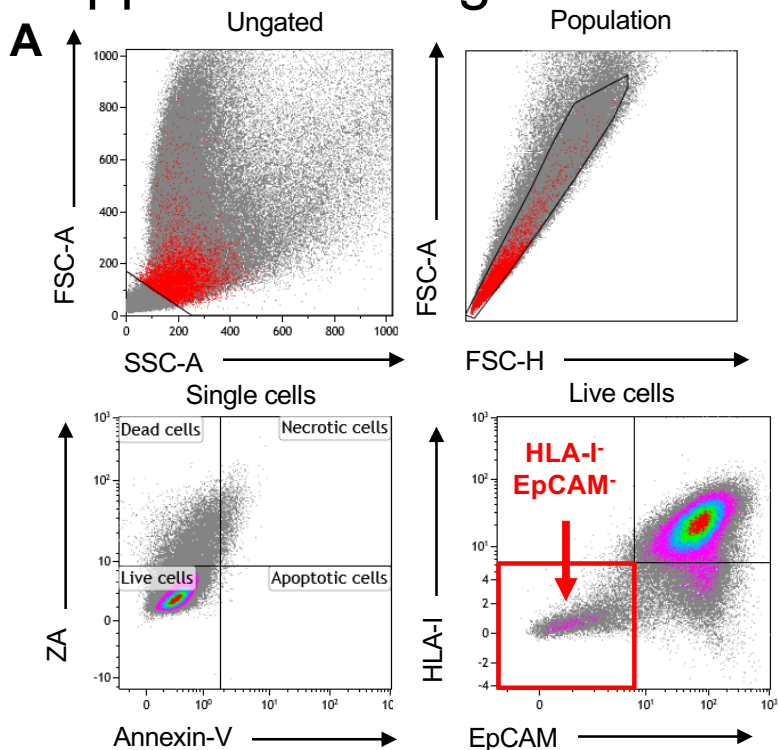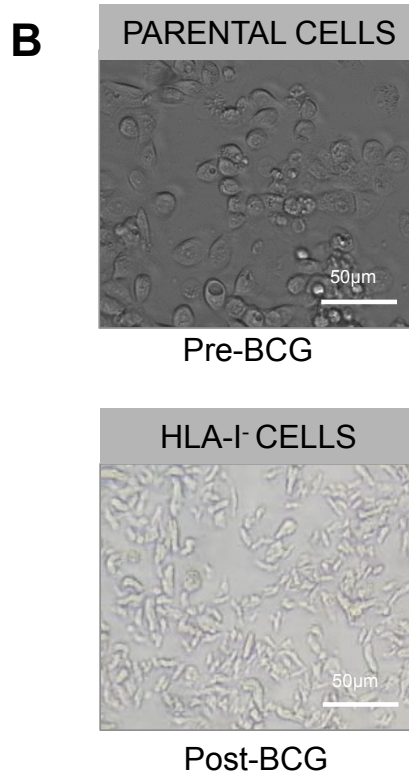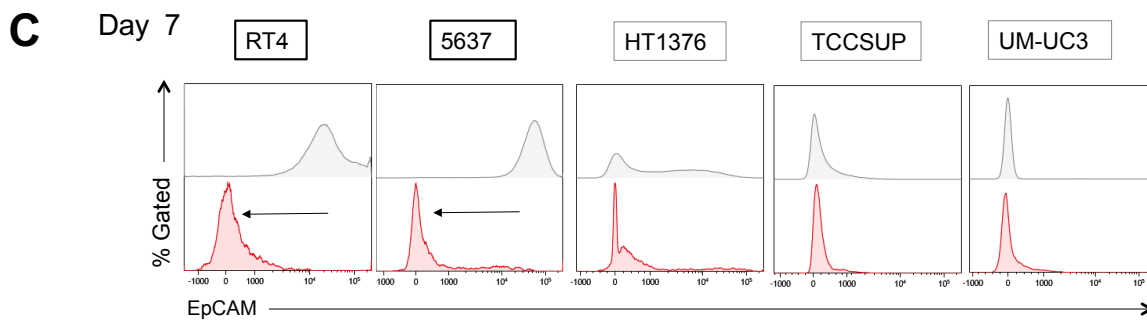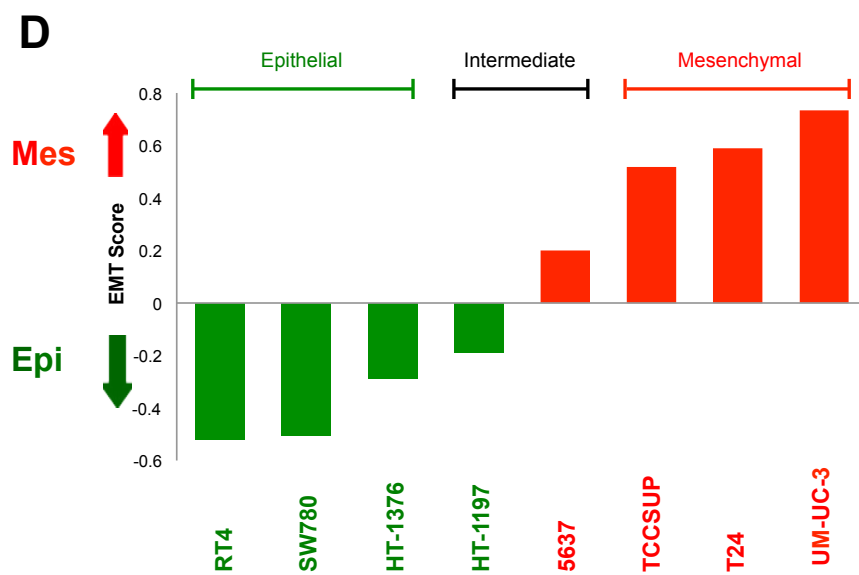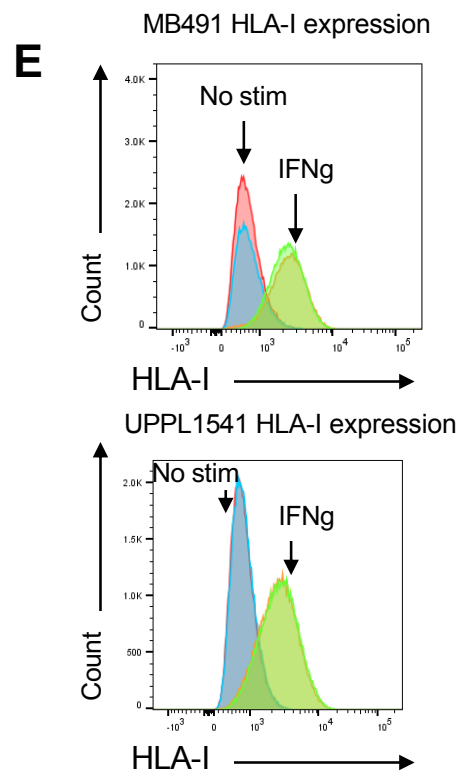

# Supplemental Figure 3

**A**

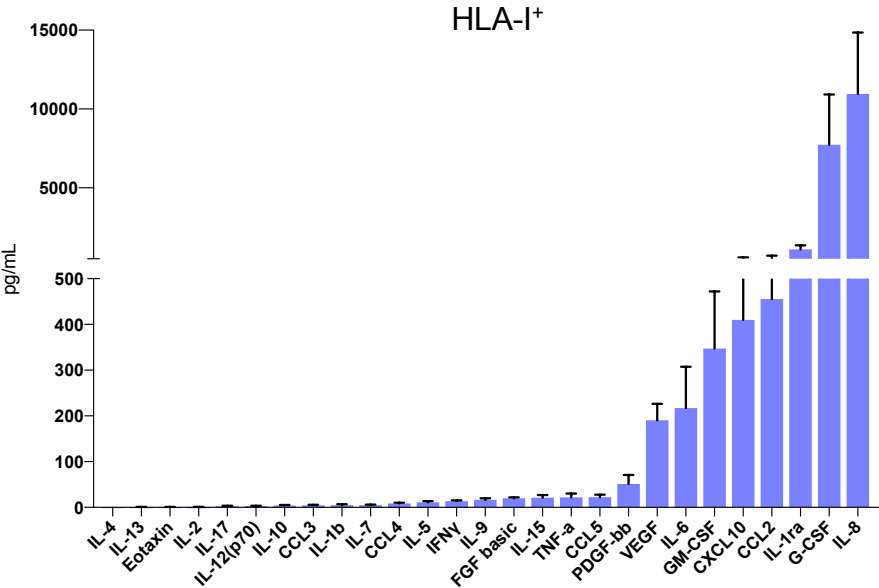

**B**

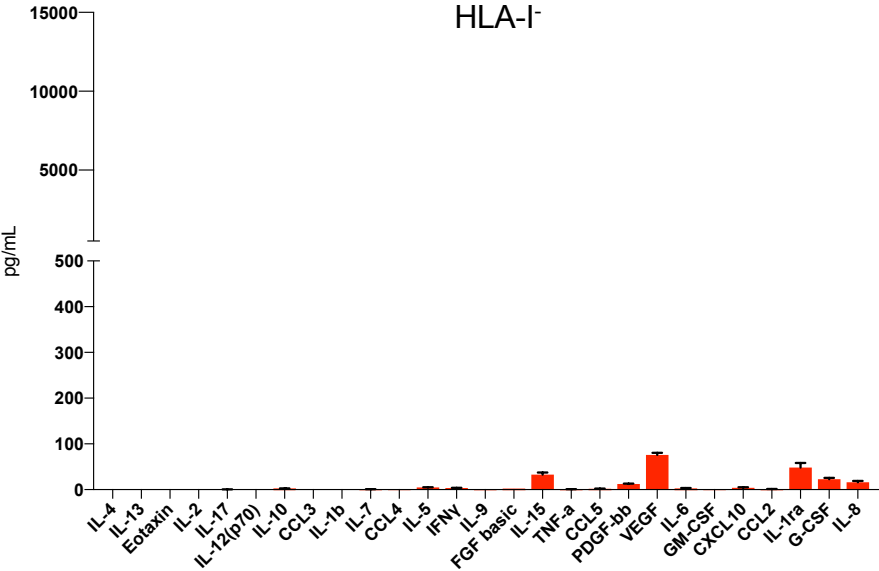

# Supplemental Figure 4

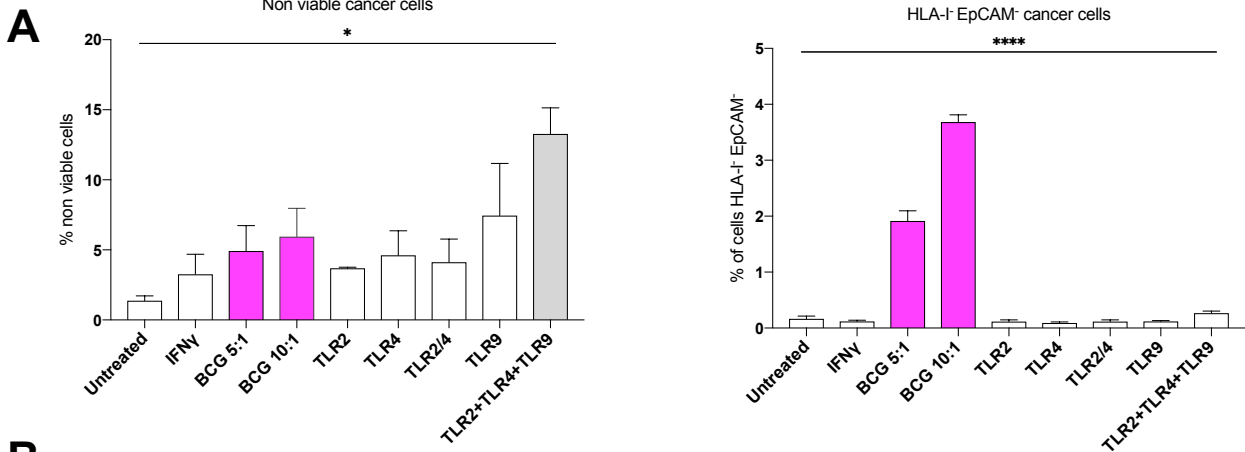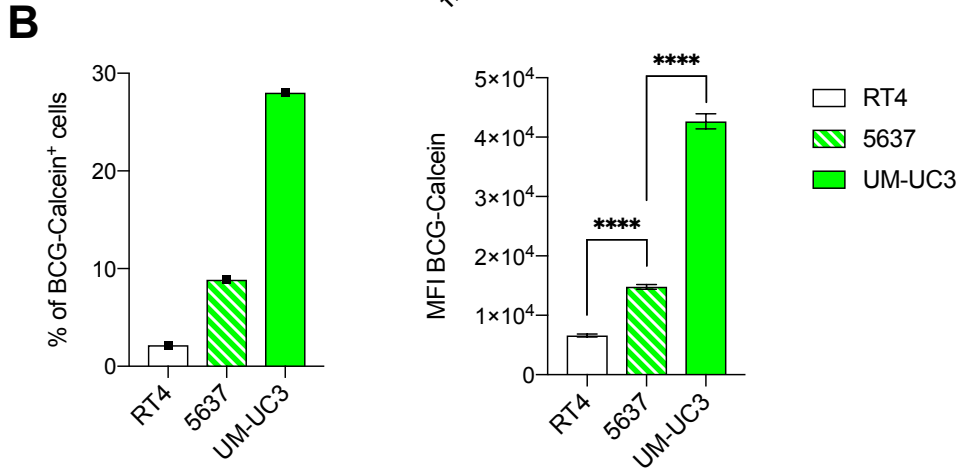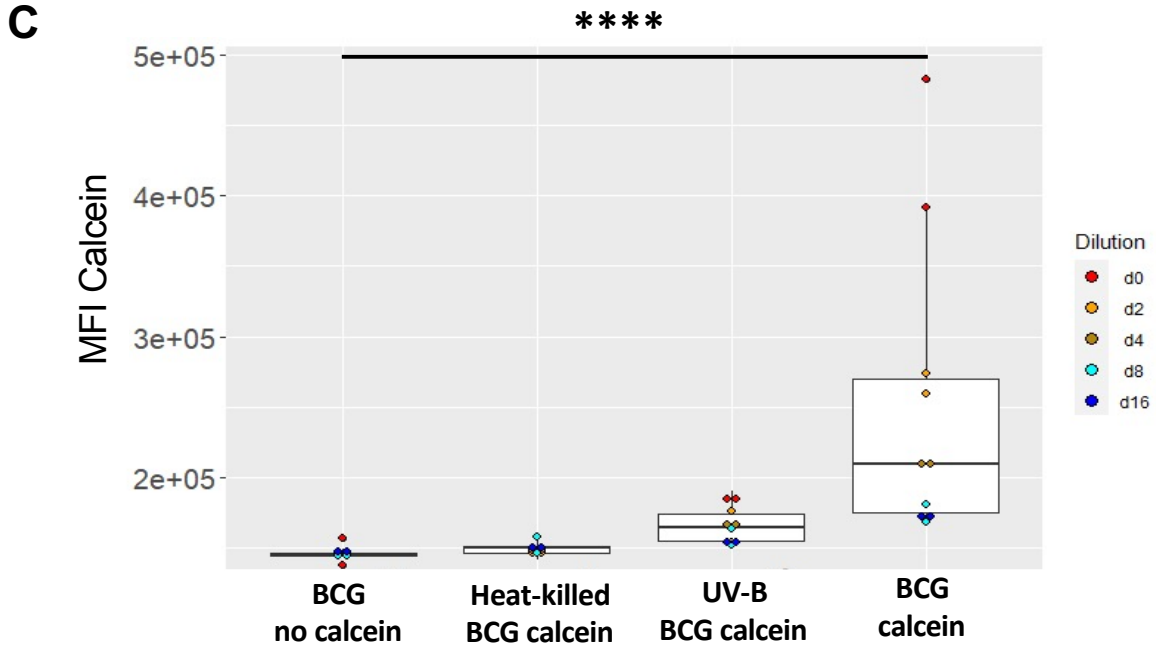

# Supplemental Figure 5

**A**

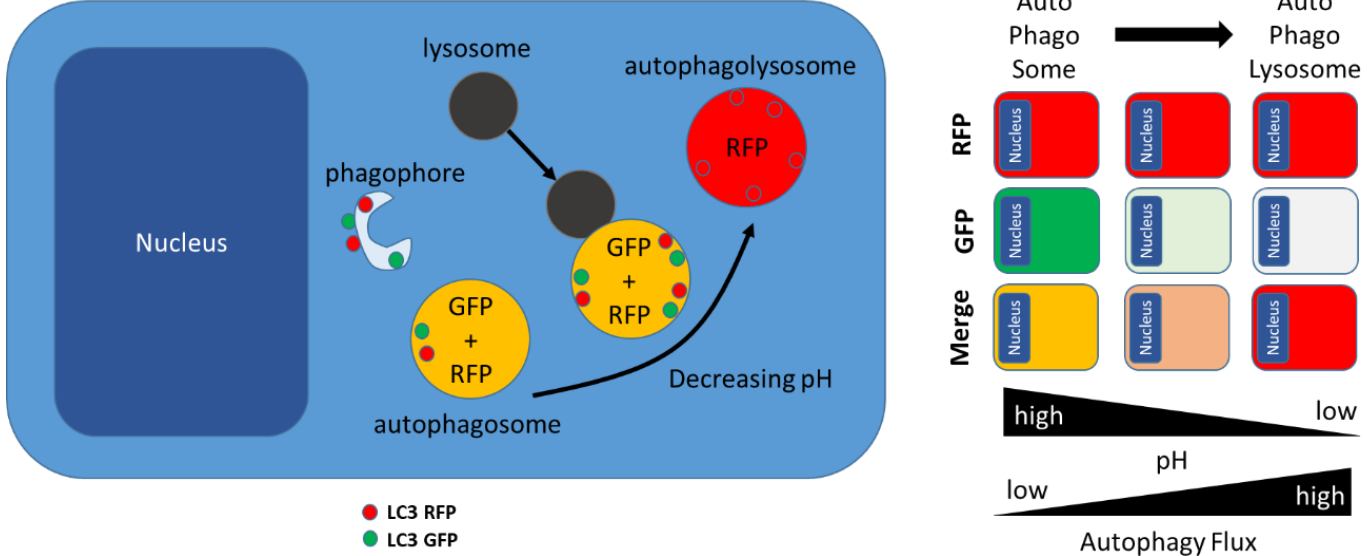

**B**

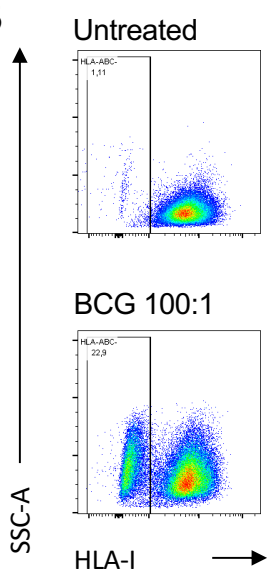

**C**

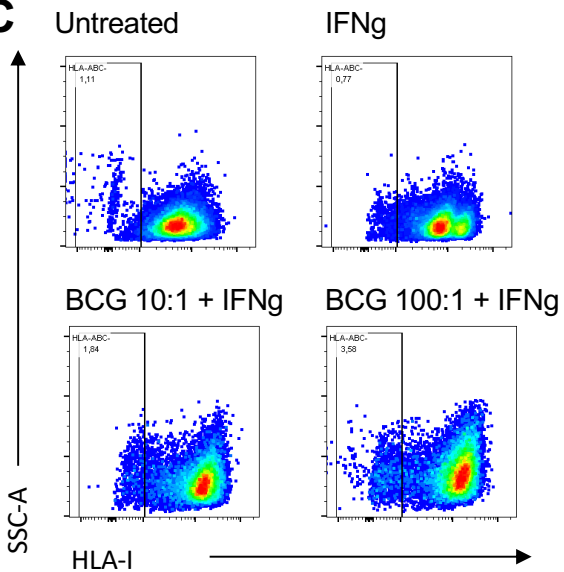

**D**

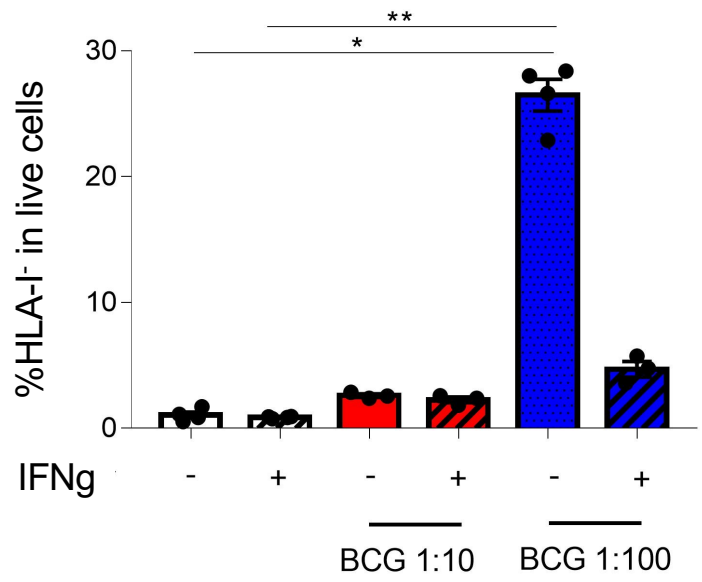

# Supplemental Figure 6

## A Tumor blocks selection of paired bladder tumors

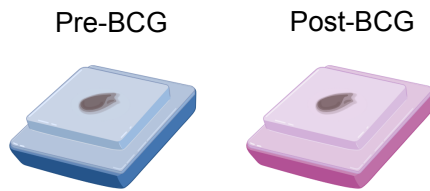

### First endoscopic resection

To capture spontaneous antitumor immune response pre BCG & post BCG

## B Tumor areas selection

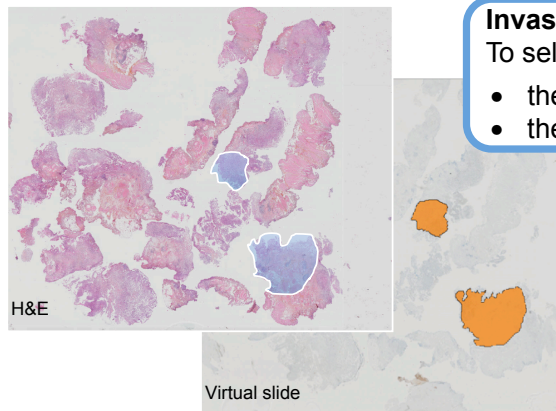

### Invasive urothelial carcinoma

To select carcinoma cells infiltrating:

- the lamina propria (NMIBC) pre-BCG
- the muscle layers (MIBC) post-BCG

## C Combined analysis of the same tumor areas with gene and protein expression

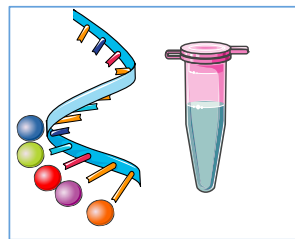

### NanoString technology

To quantify > 700 inflammatory & immune gene products

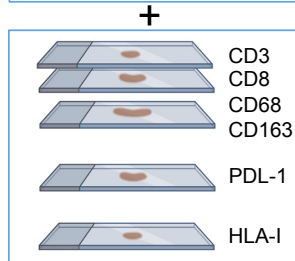

### Digital pathology

To identify protein expression using a 6-marker panel

# Supplemental Figure 7

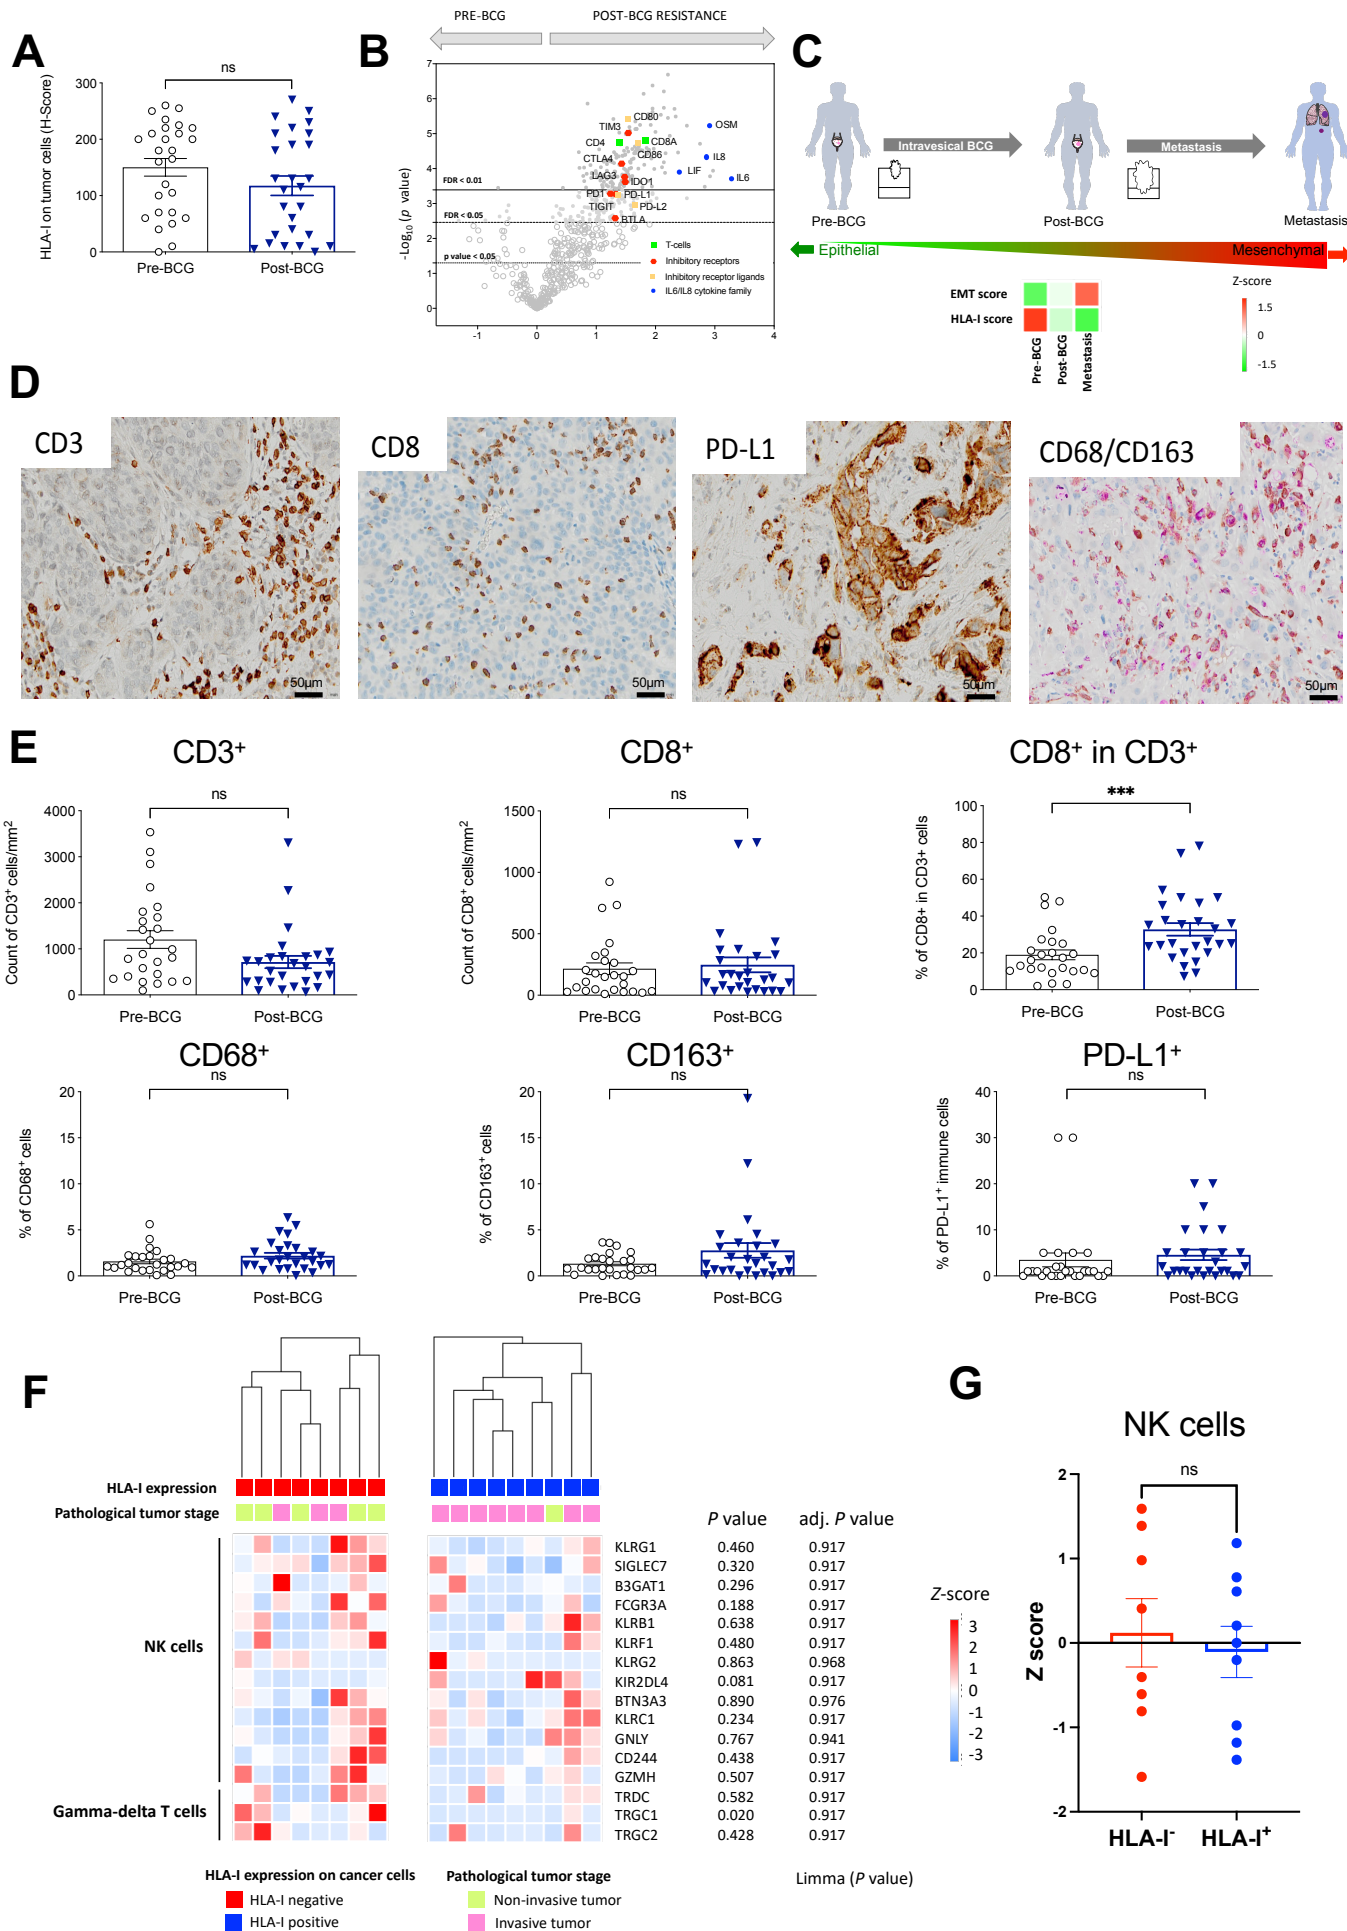

## **Supplemental Tables**

**Supplemental Table 1.** Clinical features of fresh bladder tumor donors (n=12).

**Supplemental Table 2.** List of genes selected from NanoString IO360 panel to calculate the EMT score for each bladder cancer cell line (adapted from (17) T.Z. Tan et al.)

**Supplemental Table 3.** Clinical characteristics of the RNA-seq cohort of BCG-treated bladder cancer patients (n=14).

**Supplemental Table 4.** Autophagy pathway gene set.

**Supplemental Table 5.** Clinical characteristics of patients from our cohort of bladder tumors with BCG acquired resistance (n=27)

**Supplemental Table 6.** NK and gdT cell gene sets

**Supplemental Table 1: Clinical features of fresh bladder tumors donors (n=12)**

| SAMPLE ID | Age | Gender | Prior therapy | Surgery    | Grade | CIS <sup>a</sup> | Stage | Pathology              |
|-----------|-----|--------|---------------|------------|-------|------------------|-------|------------------------|
| BLCA 1    | 60  | M      | None          | Cystectomy | High  | No               | Ta    | Urothelial carcinoma   |
| BLCA 2    | 78  | M      | None          | Cystectomy | High  | Yes              | Ta    | Urothelial carcinoma   |
| BLCA 3    | 73  | M      | None          | Cystectomy | High  | Yes              | T3b   | Urothelial carcinoma   |
| BLCA 4    | 74  | M      | None          | Cystectomy | High  | Yes              | T3b   | Urothelial carcinoma   |
| BLCA 5    | 69  | M      | BCG           | Cystectomy | High  | Yes              | T3b   | Micropapillary variant |
| BLCA 6    | 81  | F      | BCG           | Cystectomy | High  | Yes              | T3b   | Urothelial carcinoma   |
| BLCA 7    | 89  | M      | None          | Cystectomy | High  | Yes              | T3b   | Urothelial carcinoma   |
| BLCA 8    | 80  | M      | None          | Cystectomy | High  | Yes              | T3b   | Urothelial carcinoma   |
| BLCA 9    | 86  | M      | None          | Cystectomy | High  | Yes              | T3b   | Urothelial carcinoma   |
| BLCA 10   | 82  | M      | None          | Cystectomy | High  | Yes              | T3b   | Urothelial carcinoma   |
| BLCA 11   | 70  | F      | Chemotherapy  | Cystectomy | High  | No               | T4a   | Urothelial carcinoma   |
| BLCA 12   | 65  | M      | None          | Cystectomy | High  | No               | Ta    | Urothelial carcinoma   |

<sup>a</sup> Concomittant carcinoma *in situ* (CIS)  
BLCA : bladder cancer



**Supplemental Table 2** List of genes selected from NanoString IO360 panel to calculate the EMT score for each bladder cancer cell line

| Index | Gene symbol    | Gene title                                          | GO molecular function                                                                                                 | Category |
|-------|----------------|-----------------------------------------------------|-----------------------------------------------------------------------------------------------------------------------|----------|
| 1     | <i>CDH1</i>    | Cadherin 1, type 1, E-cadherin (epithelial)         | Calcium ion binding                                                                                                   | Epi      |
| 2     | <i>AREG</i>    | Amphiregulin                                        | Growth factor activity                                                                                                | Epi      |
| 3     | <i>AXL</i>     | Tyrosine-protein kinase receptor UFO                | Non-membrane spanning protein tyrosine kinase activity; transmembrane receptor protein kinase, growth factor activity | Mes      |
| 4     | <i>CBLC</i>    | Signal transduction protein CBL-C                   | Ligase activity                                                                                                       | Epi      |
| 5     | <i>DTX4</i>    | Protein deltex-4                                    | Transcription factor activity                                                                                         | Epi      |
| 6     | <i>EPCAM</i>   | Epithelial cell adhesion molecule                   | Receptor activity                                                                                                     | Epi      |
| 7     | <i>ERBB2</i>   | Receptor tyrosine-protein kinase erbB-2             | Non-membrane spanning protein tyrosine kinase activity ; growth factor activity                                       | Epi      |
| 8     | <i>FBP1</i>    | Fructose-1,6-bisphosphatase 1                       | Protein binding                                                                                                       | Epi      |
| 9     | <i>HES1</i>    | Transcription factor HES-1                          | Transcription factor activity                                                                                         | Epi      |
| 10    | <i>IL1RN</i>   | Interleukin-1 receptor antagonist protein           | Hematopoietin/interferon-class (D200-domain) cytokine receptor binding                                                | Epi      |
| 11    | <i>LOXL2</i>   | Lysyl oxidase homolog 2                             | Oxidoreductase activity;serine-type peptidase activity;receptor activity                                              | Mes      |
| 12    | <i>OAS1</i>    | 2'-5'-oligoadenylate synthase 1                     | Nucleotidyltransferase activity;nucleic acid binding                                                                  | Epi      |
| 13    | <i>TNFSF13</i> | Tumour necrosis factor ligand superfamily member 13 | ---                                                                                                                   | Epi      |
| 14    | <i>ZEB1</i>    | Zinc finger E-box-binding homeobox 1                | ---                                                                                                                   | Mes      |
| 15    | <i>CDH2</i>    | Cadherin-2                                          | G-protein coupled receptor activity;calcium ion binding                                                               | Mes      |

**Supplemental Table 3. Clinical characteristics of the RNA-seq cohort of BCG-treated bladder cancer patients (n=14)**

|                              |                  | RNA-seq cohort<br>n=14 (100%) | Post BCG HLA <sup>-</sup><br>n=8 (57%) | Post BCG HLA-I <sup>+</sup><br>n=6 (43%) | p value <sup>a</sup> |
|------------------------------|------------------|-------------------------------|----------------------------------------|------------------------------------------|----------------------|
| Age, year                    | Median           | 73.5                          | 73.5                                   | 73                                       | 0.33                 |
|                              | Range            | 46-85                         | 46-85                                  | 67-82                                    |                      |
| Gender                       | Female           | 0 (0)                         | 0 (0)                                  | 0 (0)                                    | 1                    |
|                              | Male             | 14 (100)                      | 8 (100)                                | 6 (100)                                  |                      |
| Smoking status               | Never            | 2 (14)                        | 1 (12.5)                               | 1 (17)                                   | 0.35                 |
|                              | Former           | 7 (50)                        | 4 (50)                                 | 3 (50)                                   |                      |
|                              | Current          | 1 (7)                         | 1 (12.5)                               | 0 (0)                                    |                      |
|                              | Unknown          | 4 (29)                        | 2 (25)                                 | 2 (33)                                   |                      |
| Primary therapy <sup>c</sup> | Intravesical BCG | 14 (100)                      | 8 (100)                                | 6 (100)                                  | 1                    |
|                              | Other            | 0 (0)                         | 0 (0)                                  | 0 (0)                                    |                      |
| Pre BCG tumor staging        | T1N0M0           | 14 (100)                      | 8 (100)                                | 6 (100)                                  | 1                    |
|                              | CIS <sup>b</sup> | 7 (50)                        | 2 (25)                                 | 5 (83)                                   |                      |
| Progression to MIBC          | Yes              | 9 (64)                        | 4 (50)                                 | 5 (83)                                   | 0.23                 |
|                              | No               | 5 (36)                        | 4 (50)                                 | 1 (17)                                   |                      |
| Post BCG tumor staging       | <T2N0M0          | 6 (43)                        | 5 (62.5)                               | 1 (17)                                   | 0.1                  |
|                              | ≥T2N0M0          | 8 (57)                        | 3 (37.5)                               | 5 (83)                                   |                      |
| Radical cystectomy           | Yes              | 10 (71)                       | 5 (62.5)                               | 5 (83)                                   | 0.1                  |
|                              | No               | 4 (29)                        | 3 (37.5)                               | 1 (17)                                   |                      |
| Perioperative chemotherapy   | Yes              | 2 (14)                        | 1 (12.5)                               | 1 (17)                                   | 0.84                 |
|                              | No               | 12 (86)                       | 7 (87.5)                               | 5 (83)                                   |                      |

**Supplemental Table 4. Autophagy pathway gene set**

| Gene symbol     | Gene title                                             | Function                                                                                                                                  |
|-----------------|--------------------------------------------------------|-------------------------------------------------------------------------------------------------------------------------------------------|
| <i>ATG3</i>     | Autophagy Related 3                                    | E2 ubiquitin-like-conjugating enzyme                                                                                                      |
| <i>ATG5</i>     | Autophagy Related 5                                    | ATG12-ATG5 is an E3 ubiquitin-like-conjugating enzyme                                                                                     |
| <i>ATG7</i>     | Autophagy Related 7                                    | E1 ubiquitin-like-conjugating enzyme                                                                                                      |
| <i>ATG12</i>    | Autophagy Related 12                                   | ATG12-ATG5 is an E3 ubiquitin-like-conjugating enzyme                                                                                     |
| <i>ATG13</i>    | Autophagy Related 13                                   | Required for the autophagosome formation                                                                                                  |
| <i>ATG14</i>    | Autophagy Related 14                                   | Involved in the autophagosome formation                                                                                                   |
| <i>ATG16L1</i>  | Autophagy Related 16 Like 1                            | Activates the elongation of the autophagosomal membrane                                                                                   |
| <i>BECN1</i>    | Beclin 1                                               | Core subunit of the PI3K complex                                                                                                          |
| <i>GABARAP</i>  | GABA Type A Receptor-Associated Protein                | Required for the autophagosome maturation                                                                                                 |
| <i>MAP1LC3A</i> | Microtubule Associated Protein 1 Light Chain 3 Alpha   | Involved in the autophagosome formation                                                                                                   |
| <i>PIK3C3</i>   | Phosphatidylinositol 3-Kinase Catalytic Subunit Type 3 | Catalytic subunit of the PI3K complex, PI3KC3-C1 and C2 are involved in the autophagosome formation and maturation respectively           |
| <i>OPIK3R4</i>  | Phosphoinositide-3-Kinase Regulatory Subunit 4         | Regulatory subunit of the PI3K complex                                                                                                    |
| <i>RAB7A</i>    | RAB7A, Member RAS Oncogene Family                      | Small GTPase, regulator of the autophagosome maturation                                                                                   |
| <i>RAB7B</i>    | RAB7B, Member RAS Oncogene Family                      | Small GTPase, inhibitor of autophagy                                                                                                      |
| <i>RB1CC1</i>   | RB1 Inducible Coiled-Coil 1                            | Regulates the autophagosome formation                                                                                                     |
| <i>SNAP29</i>   | Synaptosome Associated Protein 29                      | Soluble N-ethylmaleimide-sensitive factor-attachment protein receptor (SNARE), controls the fusion of the autophagosome with the lysosome |
| <i>STX17</i>    | Syntaxin 17                                            | SNARE, controls the fusion of the autophagosome with the lysosome                                                                         |
| <i>ULK1</i>     | Unc-51 Like Autophagy Activating Kinase 1              | Regulates the autophagosome formation                                                                                                     |
| <i>ULK2</i>     | Unc-51 Like Autophagy Activating Kinase 2              | Regulates the autophagosome formation                                                                                                     |
| <i>VAMP8</i>    | Vesicle Associated Membrane Protein 8                  | SNARE, controls the fusion of the autophagosome with the lysosome                                                                         |

**Supplemental Table 5. Clinical characteristics of patients from our cohort of bladder tumors with BCG acquired resistance (n=27)**

|                              |                  | Total cohort<br>n=27 (100%) | Outcome<br>Metastases<br>n=11 (41%) | Outcome<br>No metastasis<br>n=16 (59%) | p value <sup>a</sup> |
|------------------------------|------------------|-----------------------------|-------------------------------------|----------------------------------------|----------------------|
| Age, year                    | Median           | 73.5                        | 73.5                                | 73.5                                   | 0.69                 |
|                              | Range            | 46-91                       | 46-88.5                             | 56-91                                  |                      |
| Gender                       | Female           | 4 (15)                      | 3 (27)                              | 1 (6)                                  | 0.14                 |
|                              | Male             | 23 (85)                     | 8 (73)                              | 15 (94)                                |                      |
| Smoking status               | Never            | 9 (33)                      | 5 (45)                              | 4 (25)                                 | 0.17                 |
|                              | Former           | 10 (37)                     | 5 (45)                              | 5 (31)                                 |                      |
|                              | Current          | 6 (22)                      | 1 (10)                              | 5 (31)                                 |                      |
|                              | Unknown          | 2 (7)                       | 0 (0)                               | 2 (12)                                 |                      |
| Primary therapy <sup>c</sup> | Intravesical BCG | 27 (100)                    | 11 (100)                            | 16 (100)                               | 1                    |
|                              | Other            | 0 (0)                       | 0 (0)                               | 0 (0)                                  |                      |
| Pre BCG tumor staging        | T1N0M0           | 27 (100)                    | 11 (100)                            | 16 (100)                               | 1                    |
|                              | CIS <sup>b</sup> | 16 (59)                     | 5 (45)                              | 11 (69)                                |                      |
| Progression to MIBC          | Yes              | 27 (100)                    | 11 (100)                            | 16 (100)                               | 1                    |
|                              | No               | 0 (0)                       | 0 (0)                               | 0 (0)                                  |                      |
| Post BCG tumor staging       | T2N0M0           | 16 (59)                     | 7 (64)                              | 9 (56)                                 | 0.50                 |
|                              | >T2N0M0          | 11 (41)                     | 4 (36)                              | 7 (44)                                 |                      |
| Radical cystectomy           | Yes              | 20 (74)                     | 7 (64)                              | 13 (81)                                | 0.33                 |
|                              | No               | 7 (26)                      | 4 (36)                              | 3 (19)                                 |                      |
| Perioperative chemotherapy   | Yes              | 4 (20)                      | 1 (14)                              | 3 (23)                                 | 0.66                 |
|                              | No               | (26)                        | 6 (86)                              | 10 (77)                                |                      |

<sup>a</sup> P value < 0.05 are significant.

<sup>b</sup> Concomitant carcinoma in situ (CIS) at diagnosis.

<sup>c</sup> None of the patients received BCG prior to collection of the analyzed samples.

**Supplemental Table 6. NK and gdT cells gene sets**

| Gene symbol    | Gene title                                                                           | Function                                             |
|----------------|--------------------------------------------------------------------------------------|------------------------------------------------------|
| <i>KLRG1</i>   | killer cell lectin like receptor G1                                                  | Inhibitor of NK cytotoxicity                         |
| <i>SIGLEC7</i> | sialic acid binding Ig like lectin 7                                                 | Inhibitor of NK cytotoxicity                         |
| <i>B3GAT1</i>  | beta-1,3-glucuronyltransferase 1                                                     | Biosynthesis of the HNK-1 epitope on glycoproteins   |
| <i>FCGR3A</i>  | Fc fragment of IgG receptor IIIa                                                     | Receptor for the Fc fragment of immunoglobulin (Ig)G |
| <i>KLRB1</i>   | killer cell lectin like receptor B1                                                  | Inhibitor of NK cytotoxicity                         |
| <i>KLRF1</i>   | killer cell lectin like receptor F1                                                  | Activator of NK cytotoxicity                         |
| <i>KLRG2</i>   | killer cell lectin like receptor G2                                                  | Receptor with a C-type lectin domain                 |
| <i>KIR2DL4</i> | killer cell immunoglobulin like receptor, two Ig domains and long cytoplasmic tail 4 | Activator of NK cytokine and chemokine secretion     |
| <i>BTN3A3</i>  | butyrophilin subfamily 3 member A3                                                   | receptor glycoproteins of Ig superfamily             |
| <i>KLRC1</i>   | killer cell lectin like receptor C1                                                  | Inhibitor of NK cytotoxicity                         |
| <i>GNLY</i>    | granulysin                                                                           | Activator of NK cytotoxicity                         |
| <i>CD244</i>   | cluster of differentiation 244                                                       | Activator of NK cytotoxicity                         |
| <i>GZMH</i>    | granzyme H                                                                           | Activator of NK cytotoxicity                         |
| <i>TRDC</i>    | T cell receptor delta constant                                                       | Constant region of the TCR delta chain               |
| <i>TRGC1</i>   | T cell receptor gamma constant 1                                                     | Constant region of the TCR gamma chain               |
| <i>TRGC2</i>   | T cell receptor gamma constant 2                                                     | Constant region of the TCR gamma chain               |
